# Supplementary material for: FOCS: a novel method for analyzing enhancer and gene activity patterns infers an extensive enhancer–promoter map
Source: PubMed Central journal article supplement (PMC5930446; doi:10.1186/s13059-018-1432-2), 2018-05-01
Supplement: 13059_2018_1432_MOESM1_ESM.pdf [file 13059_2018_1432_MOESM1_ESM.pdf]

This PDF includes:

- Supplementary Figures 1-14
- Supplementary Tables 1-3
- Supplemental Methods

**A**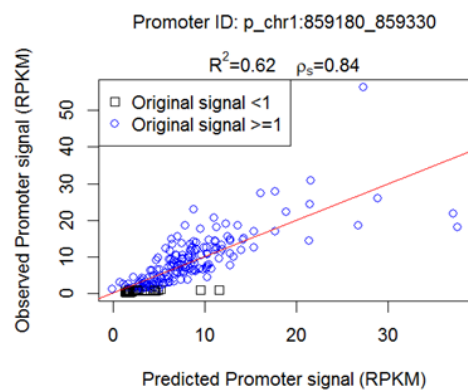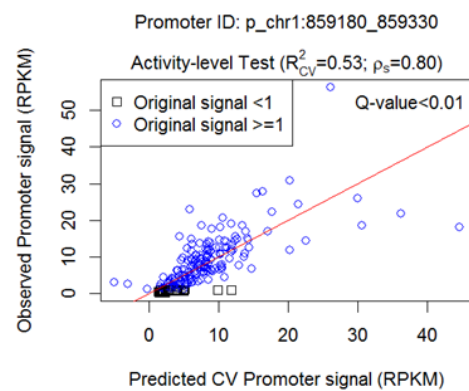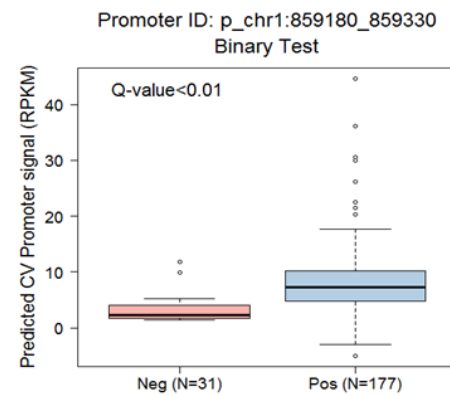**B**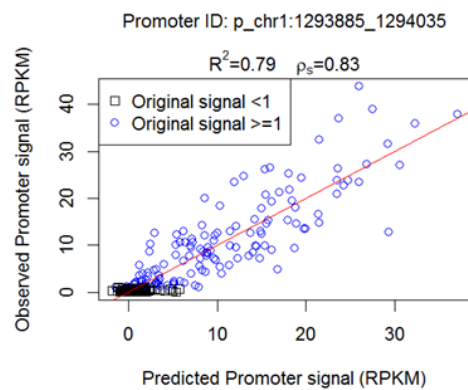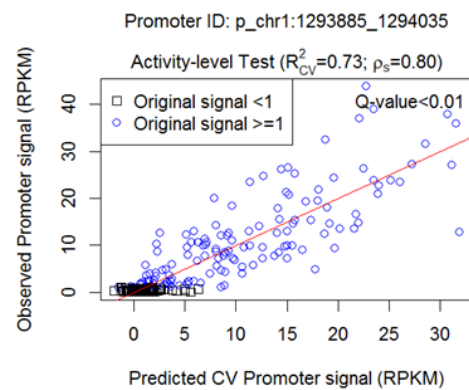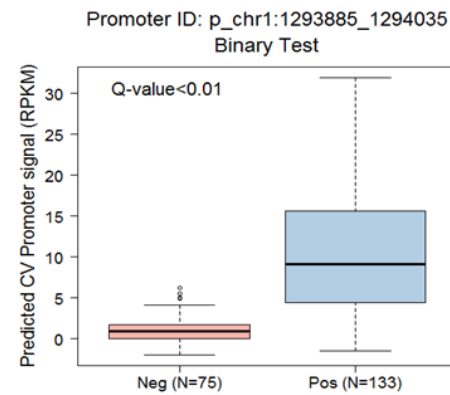**Fig. S1**

C

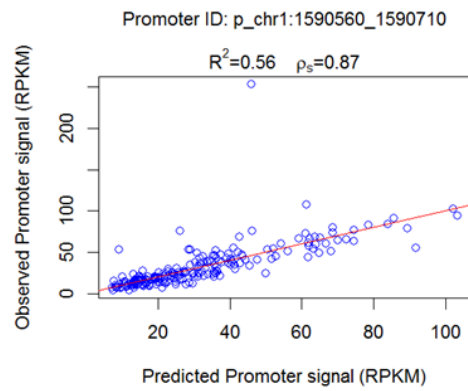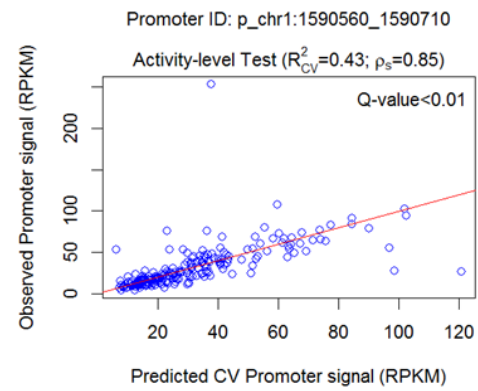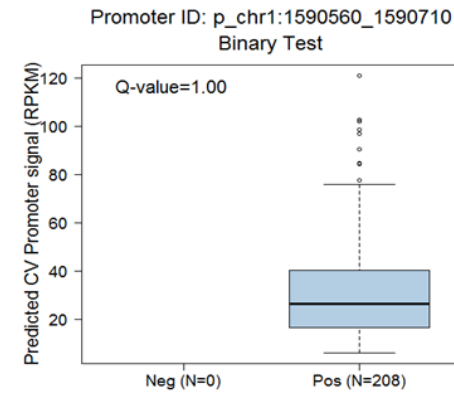

D

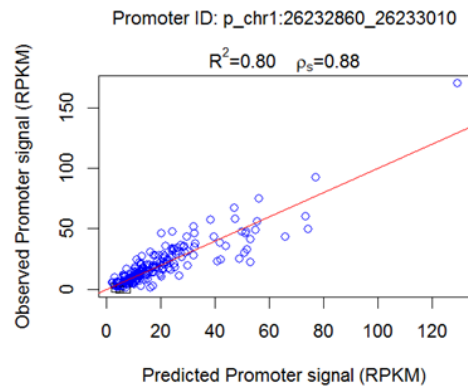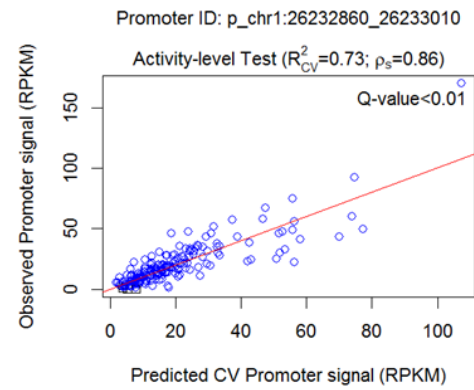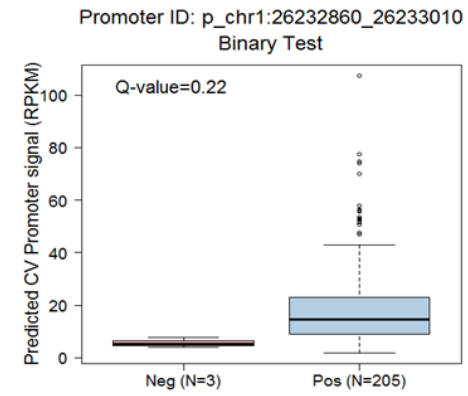

Fig. S1

**E**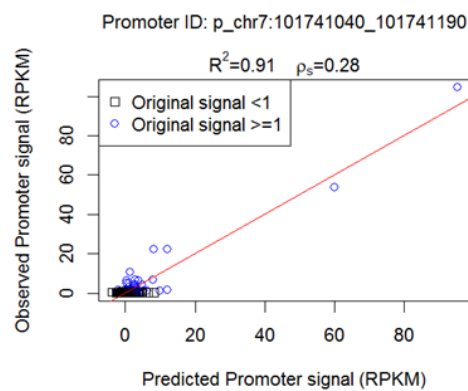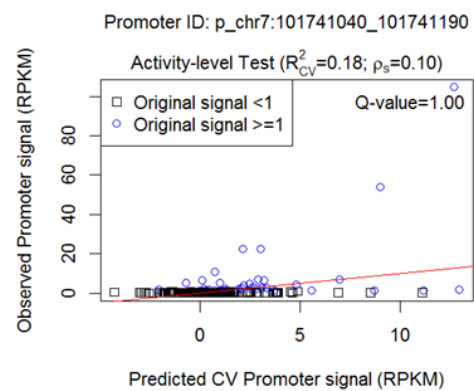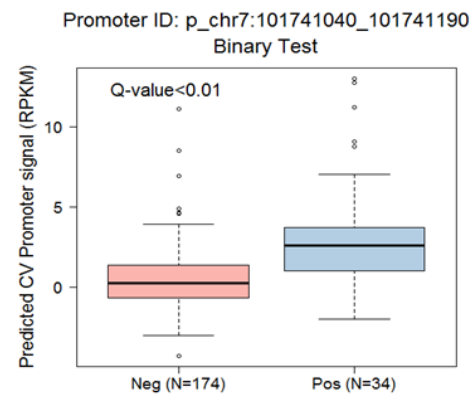**F**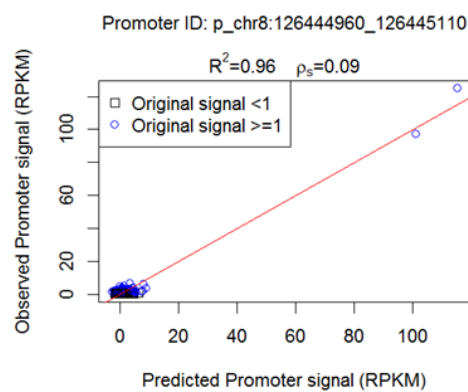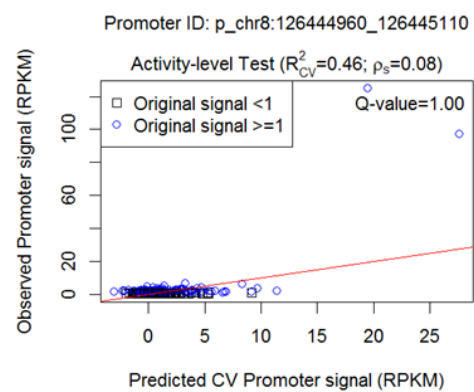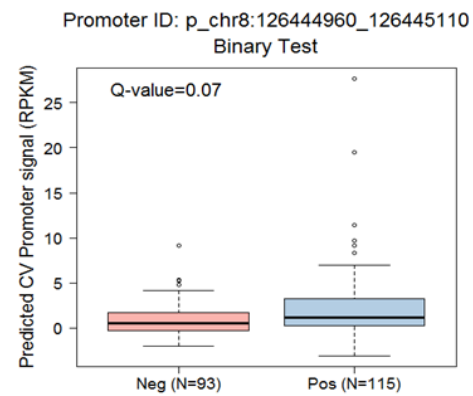**Fig. S1**

**Supplementary Figure 1. Examples of cross-validated promoter models.** Examples of promoter models that passed one or both cross-validation tests: (A-B) passed both binary and level tests (C-D) passed only the activity level test and (E-F) passed only the binary test. For each promoter, the left panel shows the correlation between observed and predicted promoter activities using OLS without cross-validation; the middle panel shows the results of the activity level validation test. Namely, the correlation between observed activities and activities that were predicted on left-out samples (LCTO CV procedure). In this test, correlation is calculated only over positive samples. The right panel shows the results of the binary test. Note in E and F left panel, the sensitivity of  $R^2$  (and, equally, of Pearson correlation) to outliers.

**A**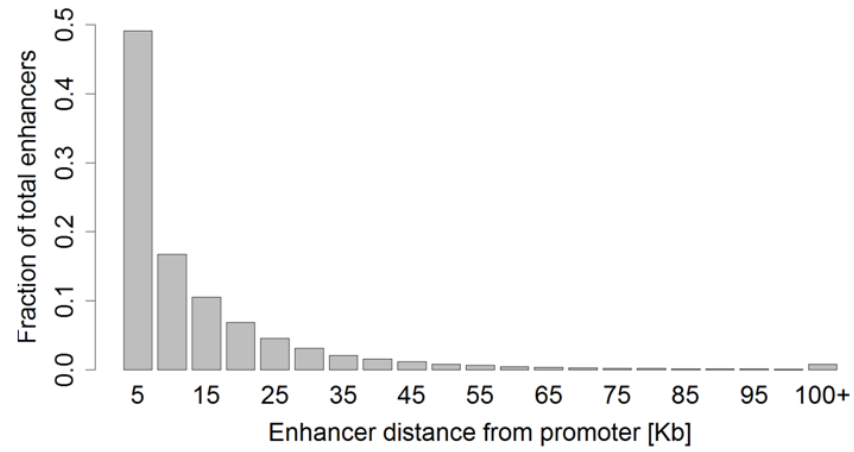**B**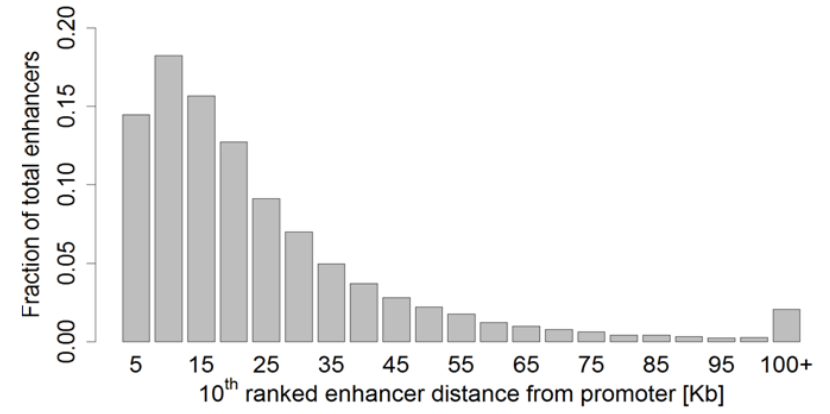**C**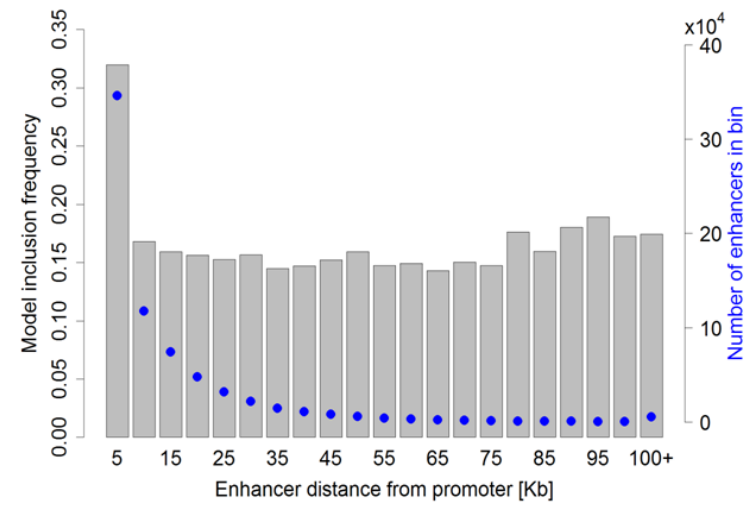**Fig. S2**

**Supplementary Figure 2. E-P distance distribution.** E-P distance distribution for: (A). All 10 enhancers in the models that passed cross validation. (B). The 10<sup>th</sup> enhancer (ranked by distance to promoter) in the models that passed cross validation. (C). Enhancer inclusion frequency in the optimally reduced models. Blue dots denote the total number of enhancers (right y-axis) in each distance bin before the shrinkage step.

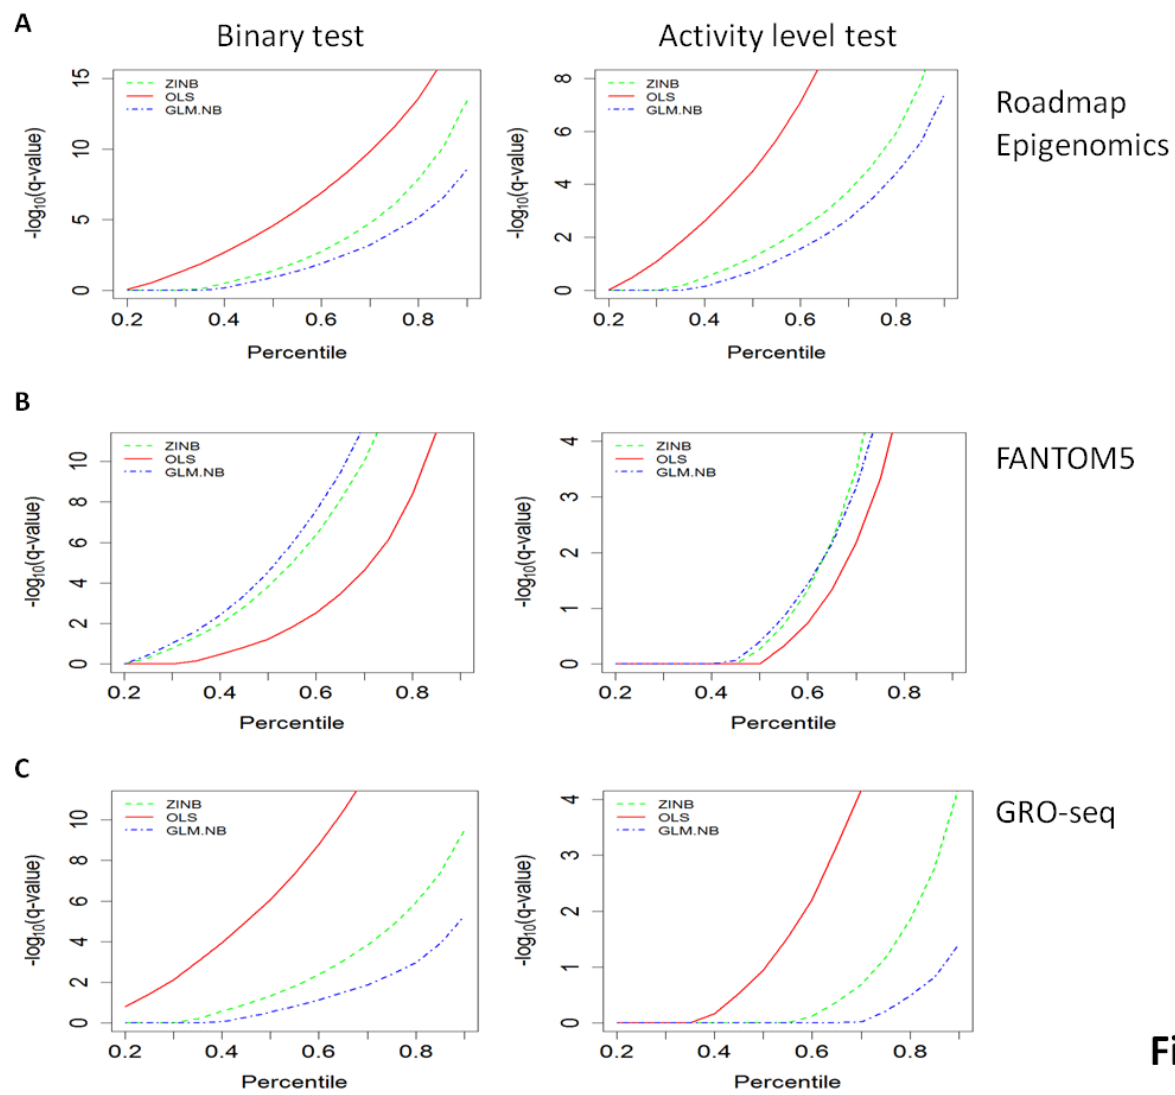

**Fig. S3**



**Supplementary Figure 3. Performance of three alternative regression methods for inferring E-P models.** Same as Figure 2A-B, but here analysis was applied to Roadmap Epigenomics (A), FANTOM5 (B) and the GRO-seq (C) datasets. Results of the binary (left panel) and activity level (right panel) validation tests are shown. OLS performed better on the Roadmap Epigenomics and GRO-seq datasets (in addition to the ENCODE data (Fig. 2A-B)), while GLM.NB and ZINB performed better on the FANTOM5 dataset.

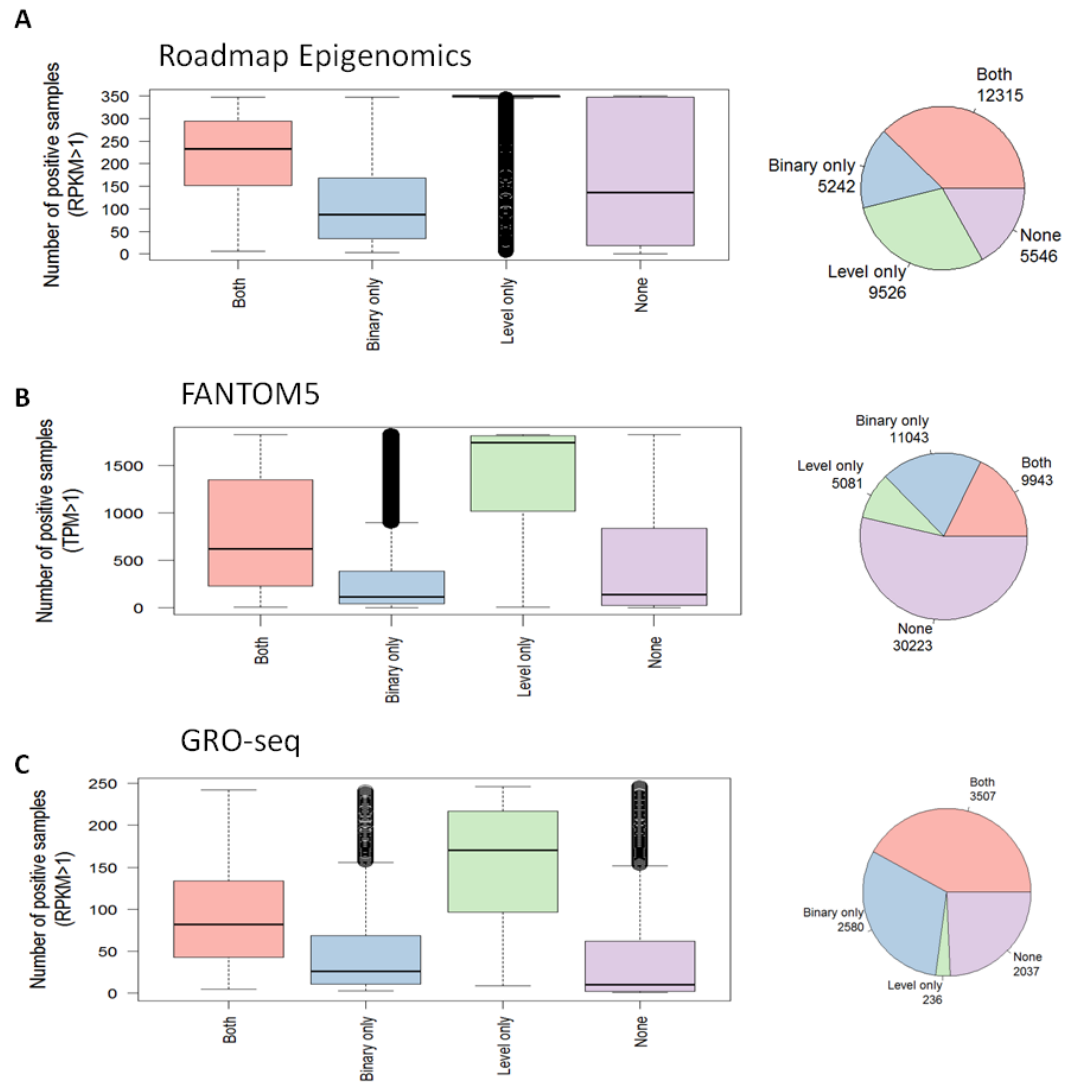

**Fig. S4**

**Supplementary Figure 4. Number of validated promoter models.** Number of promoters whose OLS models passed (at  $q\text{-value} < 0.1$ ) each of the validation tests (right panel) and the distribution of the number of positive samples in each category. (A). Roadmap Epigenomics; (B) FANTOM5 and (C) GRO-seq datasets.

**A** Roadmap Epigenomics

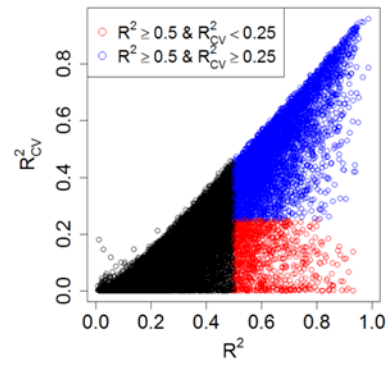

**B** FANTOM5

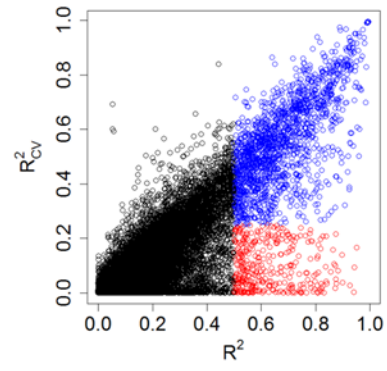

**C** GRO-seq

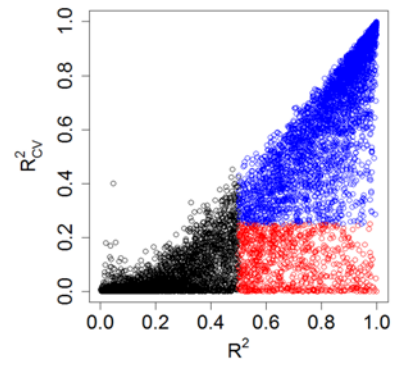

**Fig. S5**

**Supplementary Figure 5. Comparison between the  $R^2$  values with and without cross-validation (CV).** (A). Roadmap Epigenomics; (B) FANTOM5 and (C) GRO-seq datasets. Each dot is a promoter model. Blue dots denote models with  $R^2 \geq 0.5$  and  $R_{CV}^2 \geq 0.25$ . Red dots denote models with  $R^2 > 0.5$  and  $R_{CV}^2 < 0.25$ . The high rate of red dots (Roadmap (16%), FANTOM5 (20%) and GRO-seq (22%)) indicates that training the models on all samples suffer from overfitting.

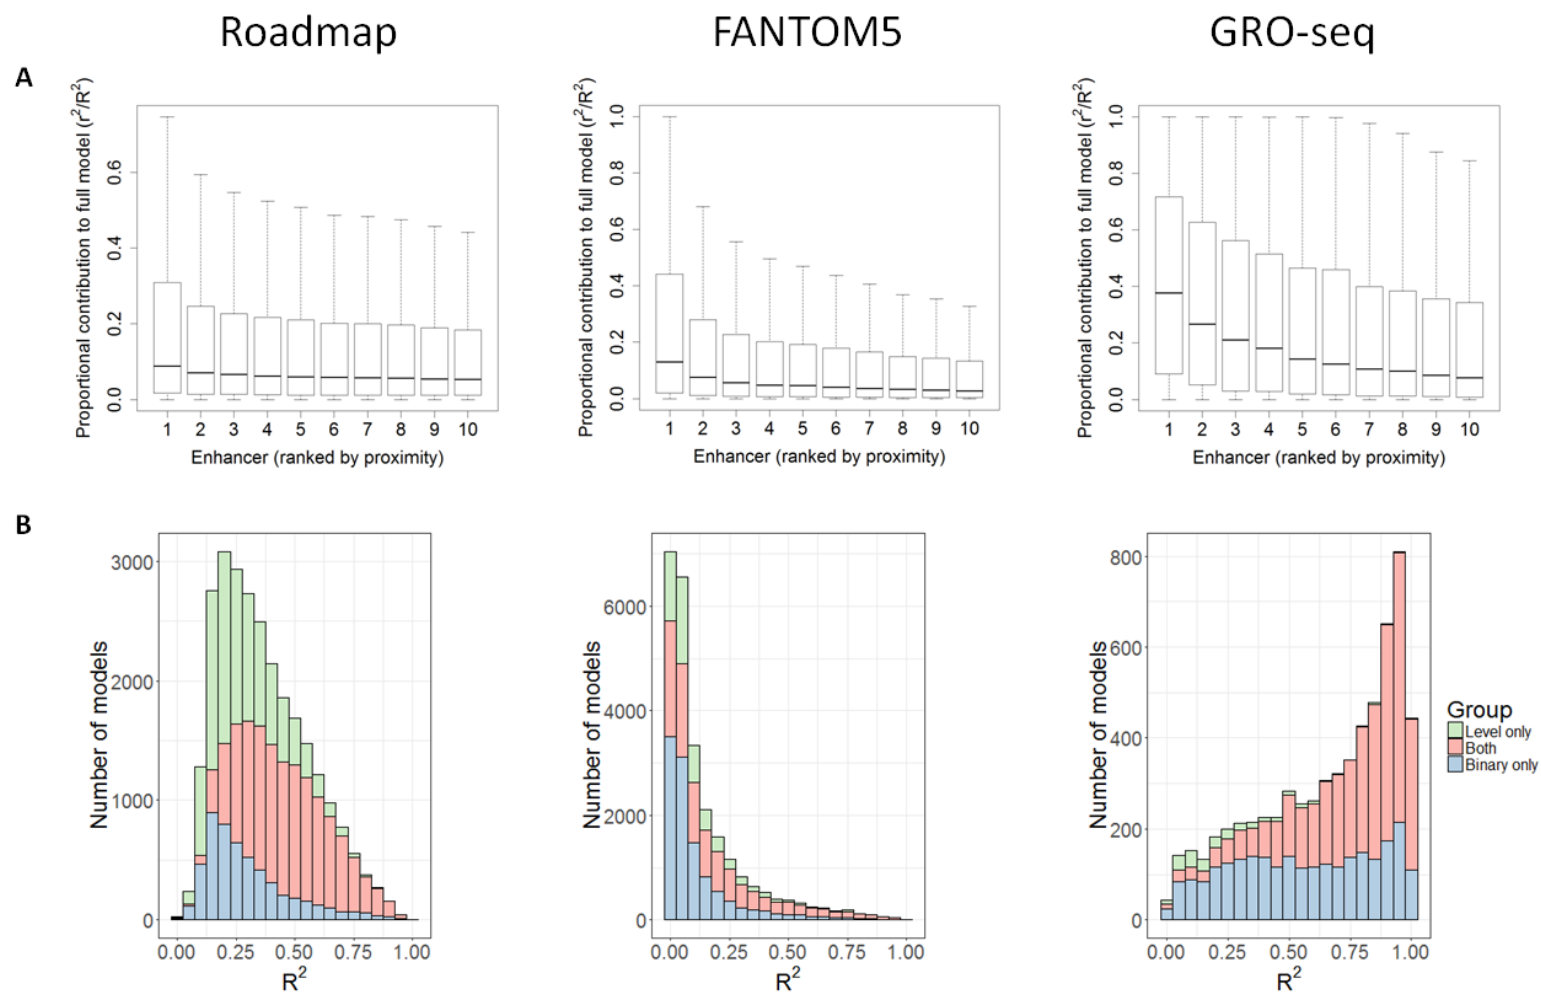

**Fig. S6**

**Supplementary Figure 6. Configuration of promoter regulation by enhancers.** (A). The proportional contribution of the 10 most proximal enhancers (within a distance of  $\pm 500$ kb from the target promoter; for FANTOM5 the distance was  $\pm 250$ kb from the target promoter) to the regression model, in each dataset (Roadmap Epigenomics, FANTOM5 and GRO-seq). The X axis indicates the order of the enhancers by their relative distance from the promoter, with 1 being the closest. (B)  $R^2$  values of the models that passed one or both CV tests, in each dataset.

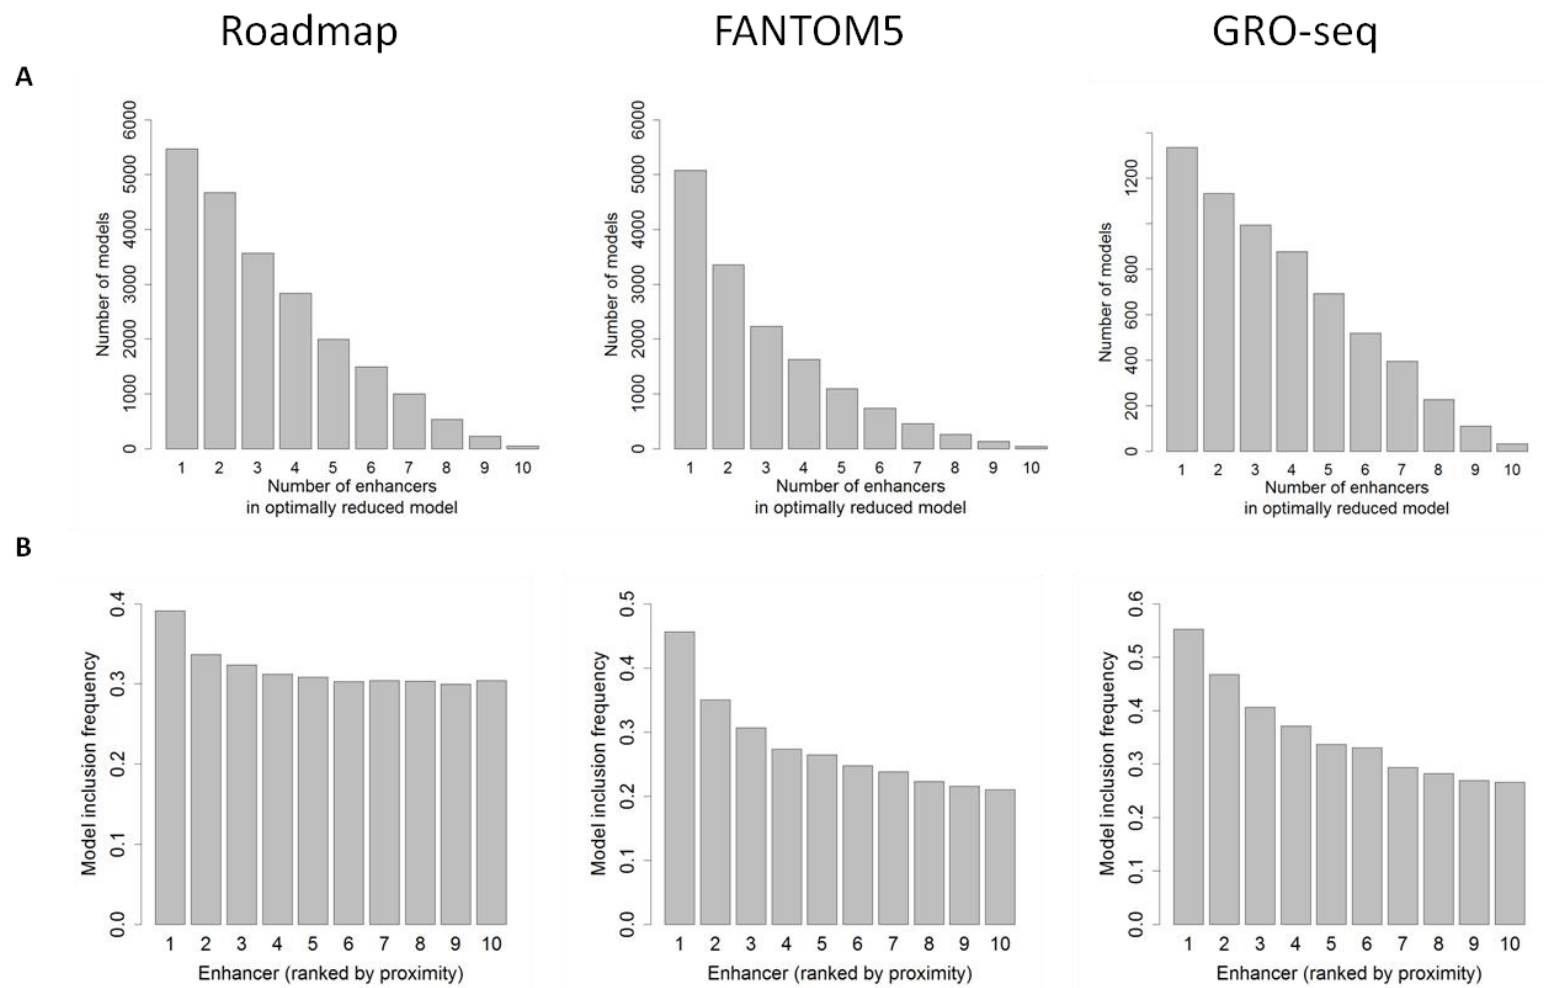

**Fig. S7**



**Supplementary Figure 7. Configuration of shrunken promoter models.** (A) Distribution of the number of enhancers included in the validated, optimally-reduced models (i.e. after elastic net shrinkage). (B) Inclusion frequency of enhancers in the reduced models as a function of their proximity ranking to the target promoter.

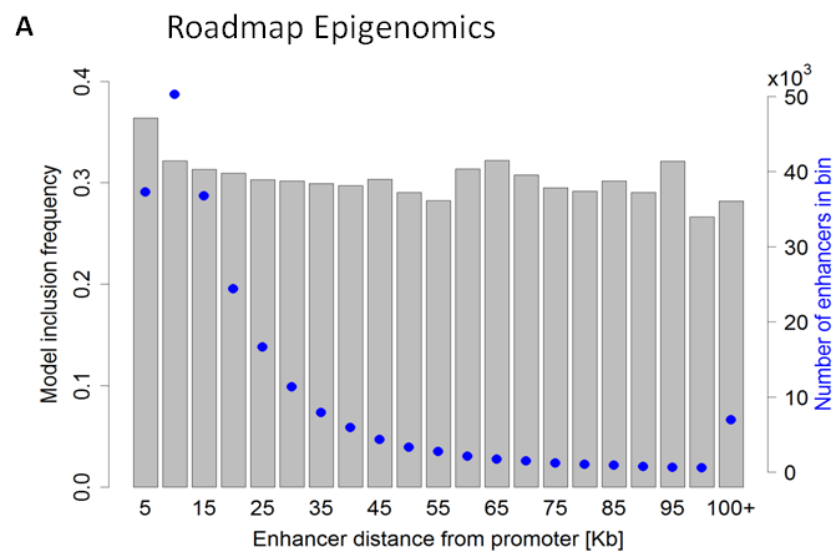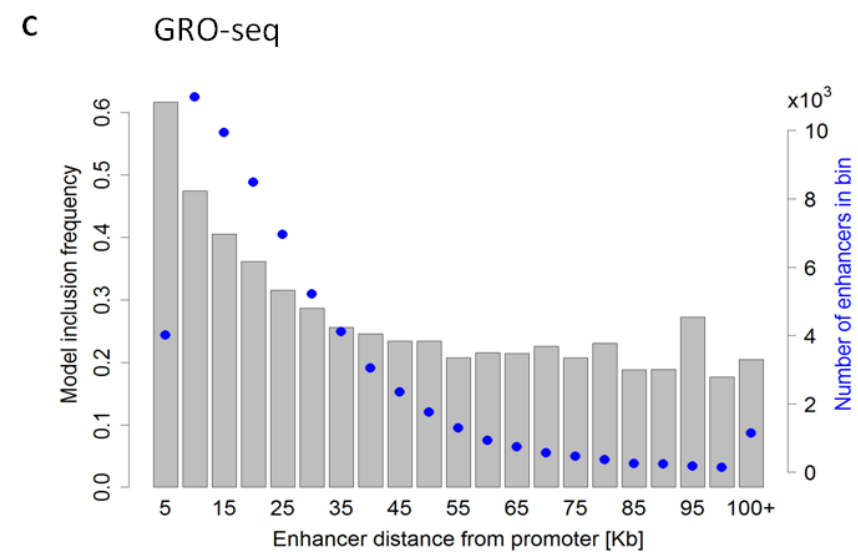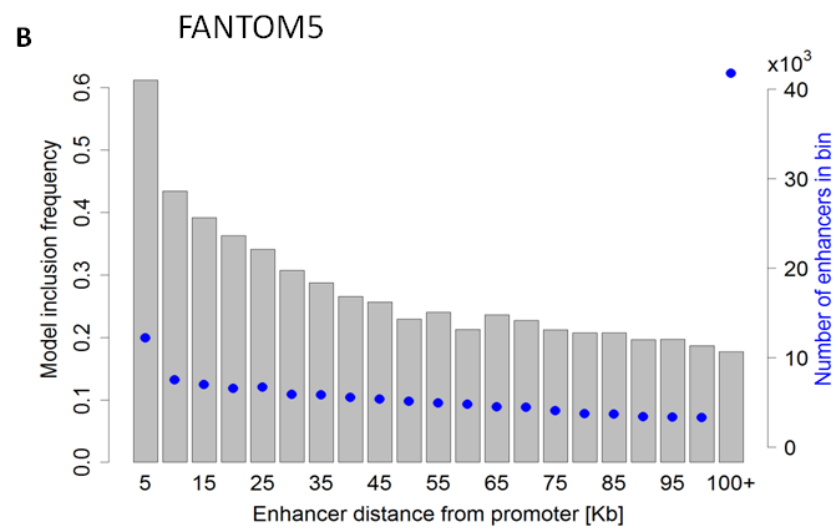

**Fig. S8**

**Supplementary Figure 8. Inclusion frequency of enhancers as function of E-P distance.** Inclusion frequency of enhancers in the reduced models as a function of their distance from the target promoter for (A) Roadmap Epigenomics, (B) FANTOM5 and (C) GRO-seq datasets. Blue dots denote the number of enhancers (right y-axis) in each bin before the shrinkage step.

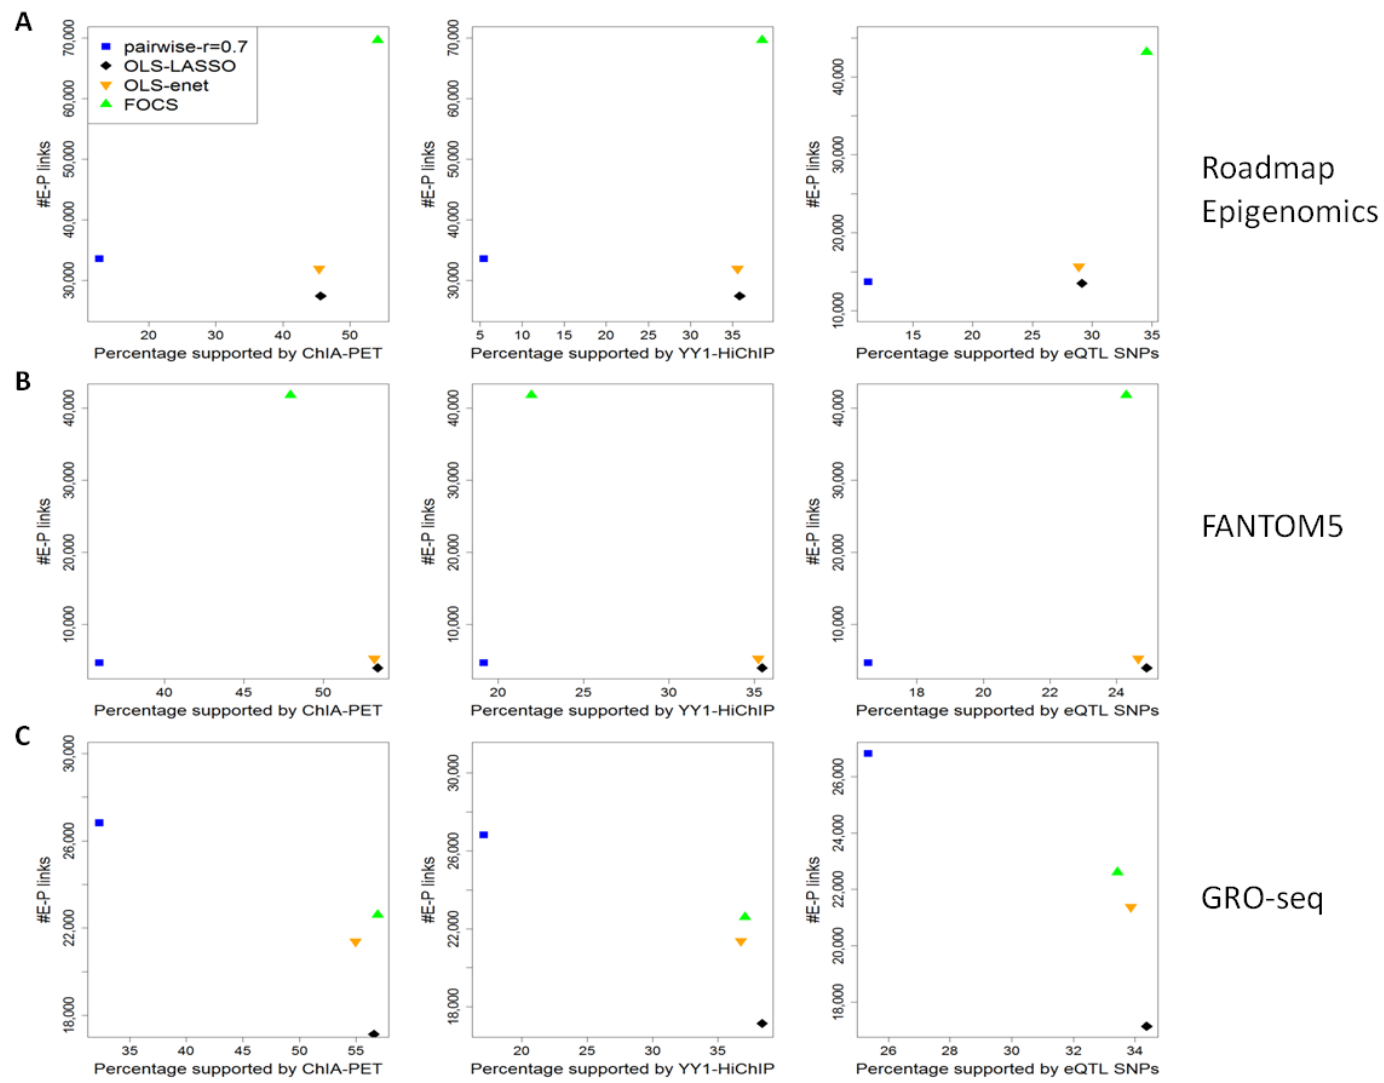

Fig. S9

**Supplementary Figure 9. Comparison of the performance of different methods for predicting E-P links using ChIA-PET, YY1-HiChIP and eQTL data as external validation.** As in Fig. 4, but for Roadmap Epigenomics (A), FANTOM5 (B) and GRO-seq (C) datasets.

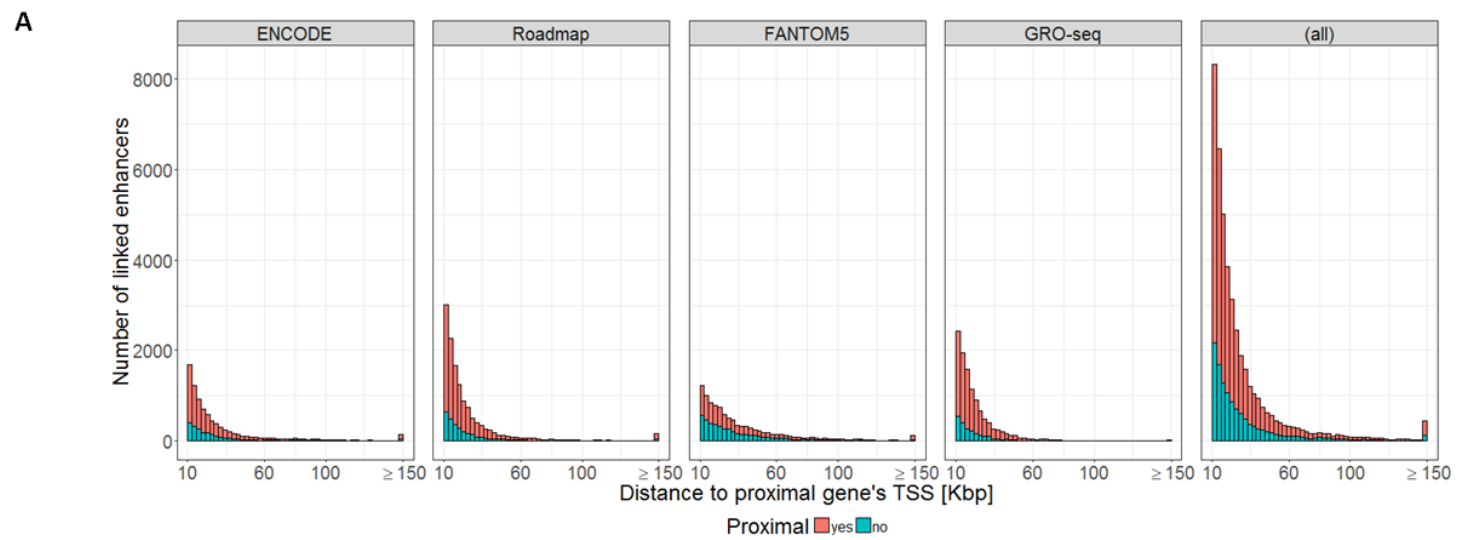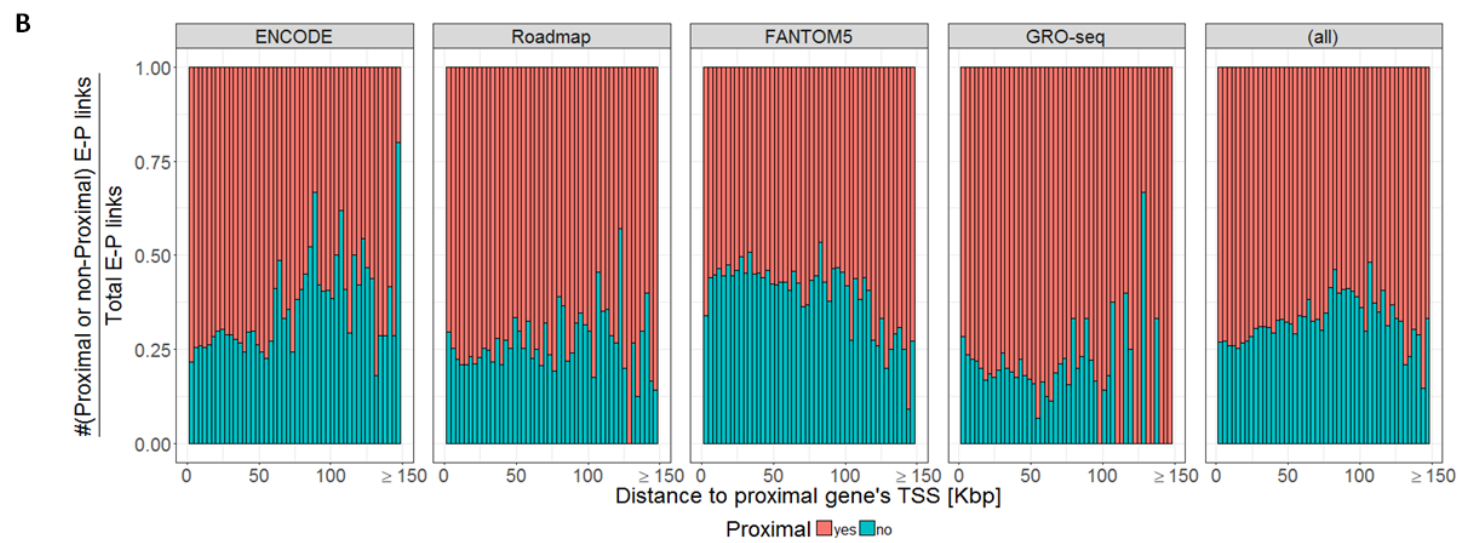

**Fig. S10**

**Supplementary Figure 10. Enhancers are frequently linked to genes more distal to the nearest one.** The number (A) and proportion (B) of enhancers that are linked to nearest/more distal promoter as a function of their distance to the nearest promoter.

A

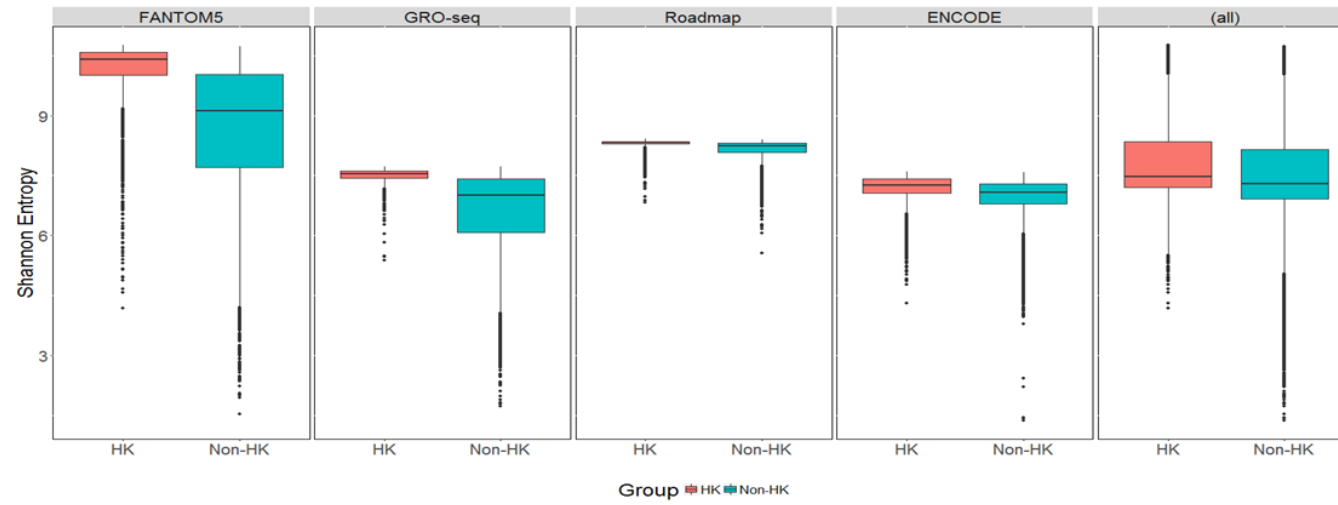

B

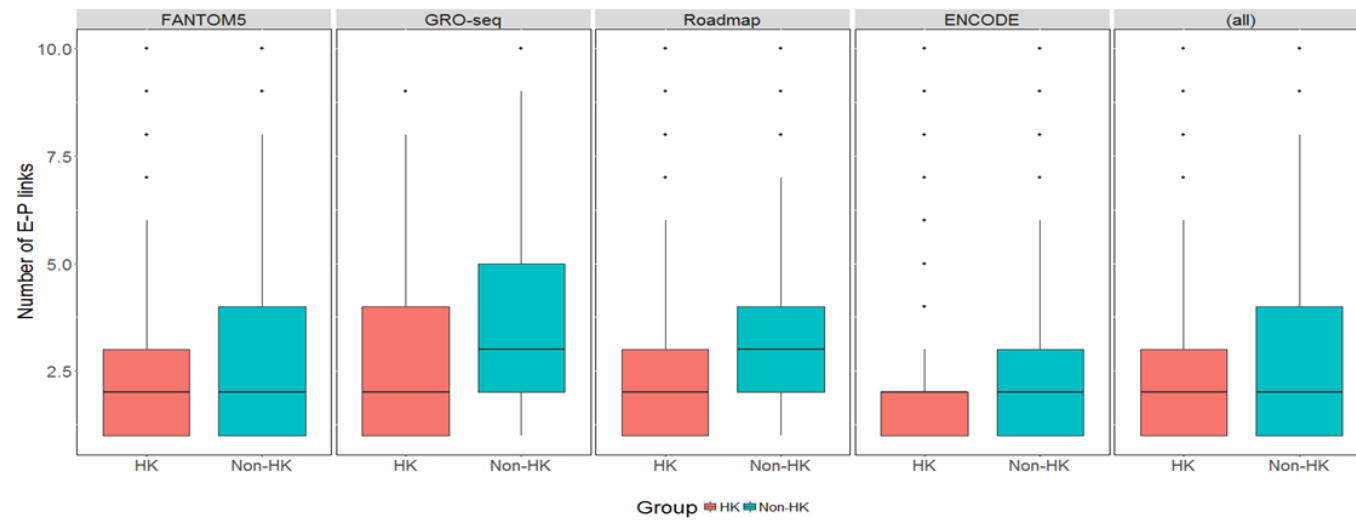

Fig. S11



**Supplementary Figure 11. House-keeping genes show simpler pattern of E-P interactions.** (A). Ubiquitous vs. cell-type specific expression pattern is quantified by Shannon Entropy. In all datasets, housekeeping (HK) genes show significantly higher Shannon Entropy than the rest of genes, reflecting their more uniform activity pattern over the examined cell panel. (B). Promoters of HK genes are involved in significantly lower number of E-P interactions than other genes (in all cases, p-value  $\ll 0.001$ ; calculated by one-sided Wilcoxon rank-sum test).

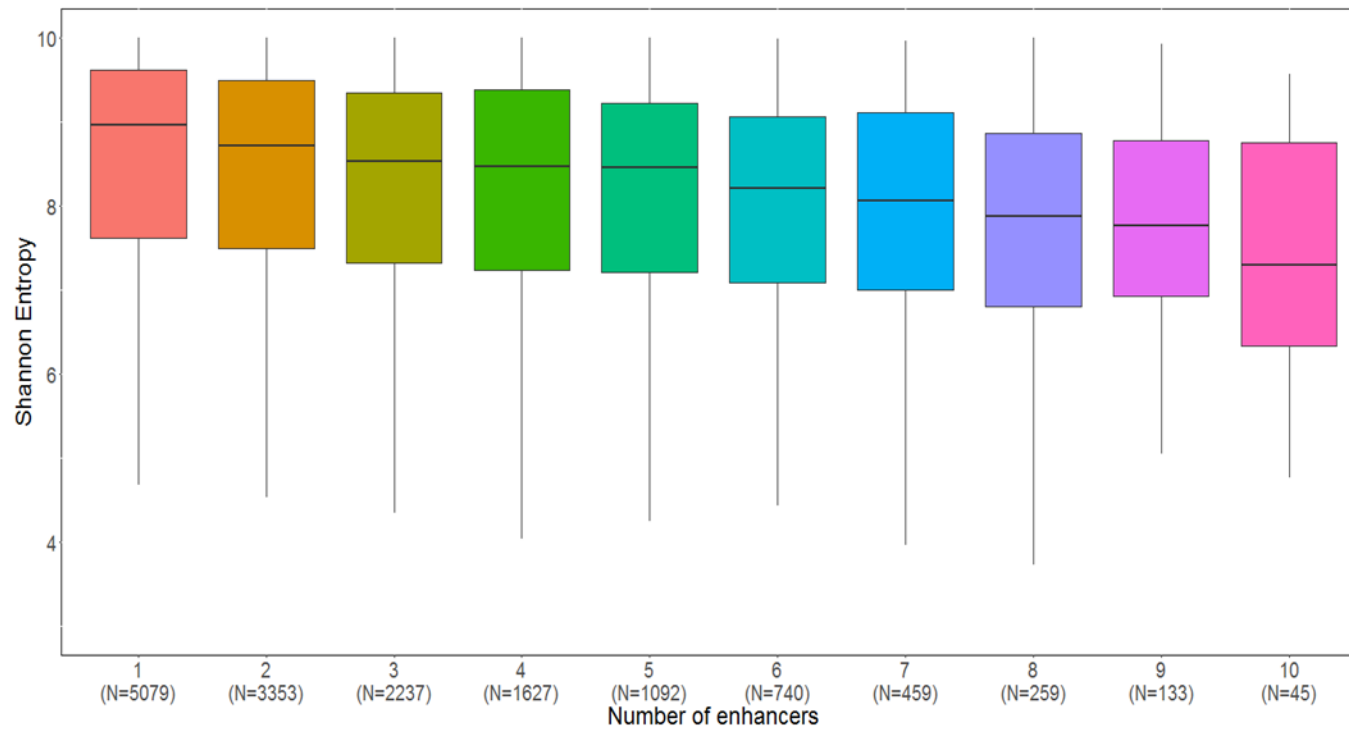

**Fig. S12**

**Supplementary Figure 12. Opposite relationship between breadth of promoter activity over cell types and complexity of transcriptional regulation.** Same analysis as shown in Fig. 6, but here applied to FANTOM5 CAGE data.

### A PARP2

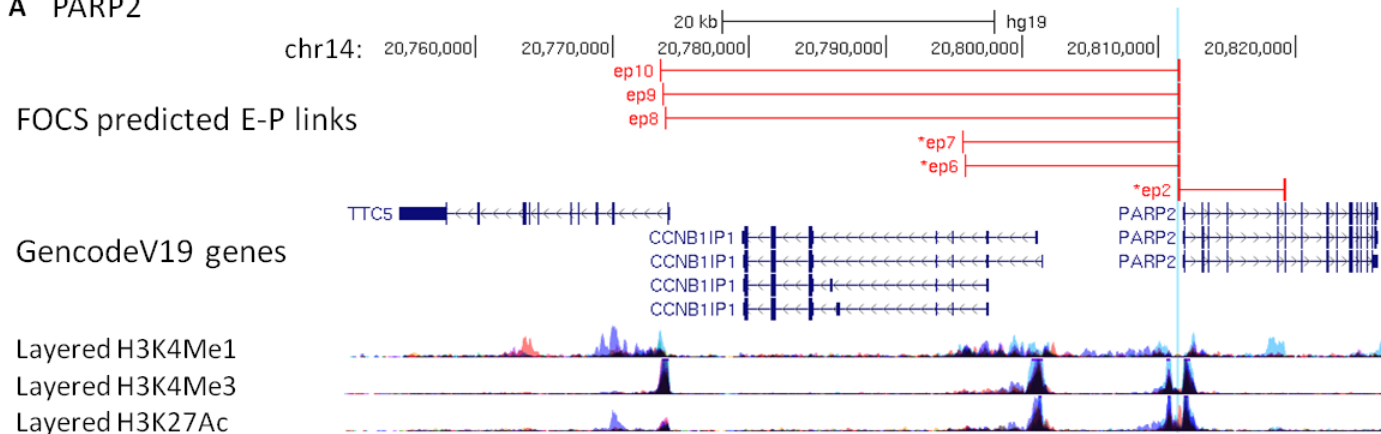

### B PARP2

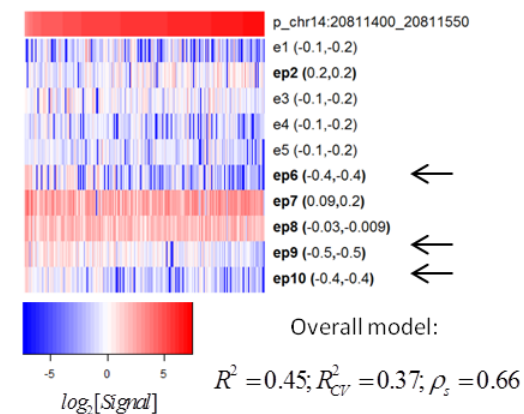

### C LRP10

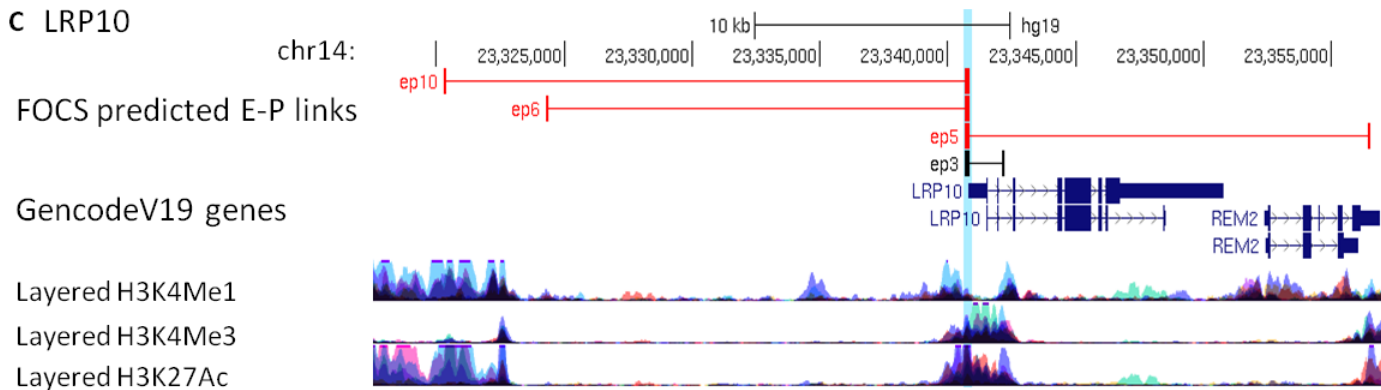

### D LRP10

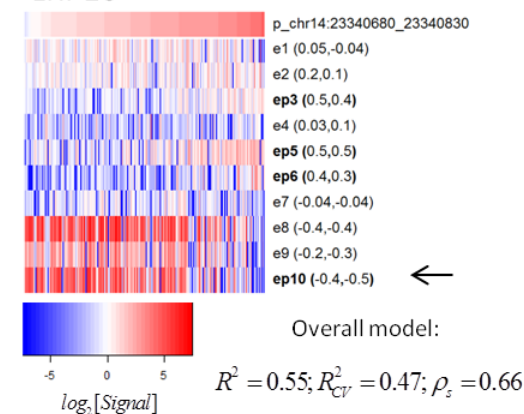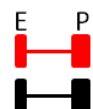

E P  
E-P with ChIA-PET support  
E-P without ChIA-PET support

\*ep: E-P with eQTL support

**Fig. S13**

**Supplementary Figure 13. Examples for promoter models that include negatively correlated enhancers.** (see legend of Fig. 5). In the heatmap, negatively correlated enhancers (indication of a repressor function) are indicated by an arrow.

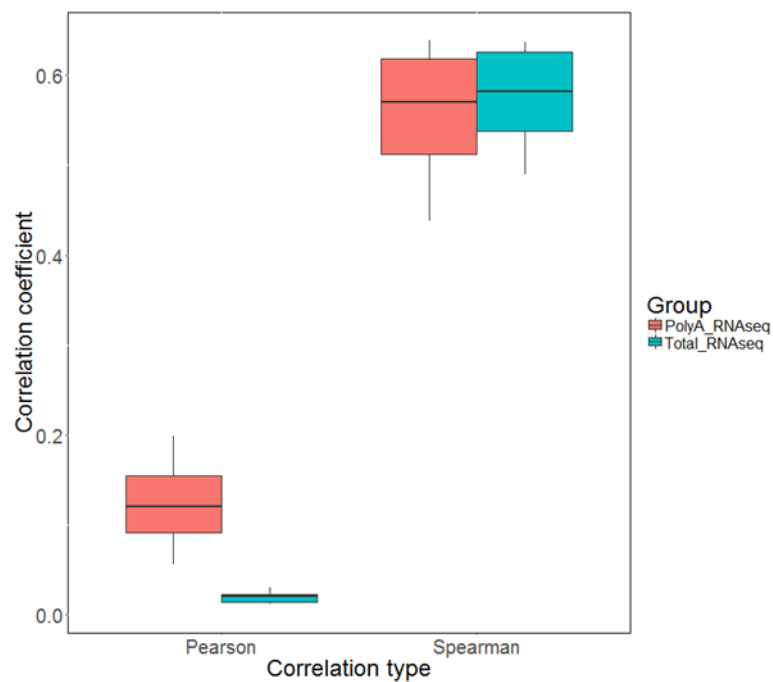

**Fig. S14**

**Supplementary Figure 14. Correlation between promoter DHS signal and gene expression.** We examined the correlation between DHS signal at promoters and gene expression levels using ENCODE cell lines for which both DHS and RNA-seq dataset were available (this included 11 cell-lines with polyA RNA-seq and 6 cell lines with total RNA-seq). In all cases, we observed high Spearman but low Pearson correlation indicating strong monotonic, non-linear relationship.

Supplementary Tables

| <b>Table S1. Number of promoter models in each regression method</b> |             |             |                            |                    |             |
|----------------------------------------------------------------------|-------------|-------------|----------------------------|--------------------|-------------|
| <b>Method</b>                                                        | <b>Data</b> | <b>Both</b> | <b>Activity level only</b> | <b>Binary only</b> | <b>None</b> |
| OLS (FDR≤0.1)                                                        | ENCODE      | 52,658      | 17,807                     | 15,437             | 7,007       |
| GLM.NB(FDR≤0.1)                                                      | ENCODE      | 33,286      | 20,233                     | 17,950             | 21,440      |
| ZINB(FDR≤0.1)                                                        | ENCODE      | 41,336      | 19,919                     | 12,672             | 18,982      |
| OLS (FDR≤0.2)                                                        | ENCODE      | 55,975      | 17,083                     | 14,036             | 5,815       |
| GLM.NB(FDR≤0.2)                                                      | ENCODE      | 37,094      | 19,879                     | 17,549             | 18,387      |
| ZINB(FDR≤0.2)                                                        | ENCODE      | 44,240      | 19,742                     | 12,384             | 16,543      |
| OLS (FDR≤0.1)                                                        | Roadmap     | 12,315      | 9,526                      | 5,242              | 5,546       |
| GLM.NB(FDR≤0.1)                                                      | Roadmap     | 6,752       | 7,493                      | 5,369              | 13,045      |
| ZINB(FDR≤0.1)                                                        | Roadmap     | 8,728       | 7,646                      | 4,550              | 11,705      |
| OLS (FDR≤0.2)                                                        | Roadmap     | 13,124      | 9,530                      | 5,053              | 4,922       |
| GLM.NB(FDR≤0.2)                                                      | Roadmap     | 7,570       | 7,929                      | 5,428              | 11,702      |
| ZINB(FDR≤0.2)                                                        | Roadmap     | 9,520       | 8,064                      | 4,566              | 10,479      |
| OLS (FDR≤0.1)                                                        | FANTOM5     | 9,943       | 5,081                      | 11,043             | 30,223      |
| GLM.NB(FDR≤0.1)                                                      | FANTOM5     | 14,197      | 3,221                      | 13,758             | 25,114      |
| ZINB(FDR≤0.1)                                                        | FANTOM5     | 13,640      | 3,377                      | 13,461             | 25,812      |
| OLS (FDR≤0.2)                                                        | FANTOM5     | 11,072      | 5,127                      | 11,503             | 28,588      |
| GLM.NB(FDR≤0.2)                                                      | FANTOM5     | 15,396      | 3,210                      | 13,530             | 24,154      |
| ZINB(FDR≤0.2)                                                        | FANTOM5     | 14,719      | 3,308                      | 13,429             | 24,834      |
| OLS (FDR≤0.1)                                                        | GRO-seq     | 3,507       | 236                        | 2,580              | 2,037       |
| GLM.NB(FDR≤0.1)                                                      | GRO-seq     | 606         | 377                        | 2,659              | 4,718       |
| ZINB(FDR≤0.1)                                                        | GRO-seq     | 1,334       | 657                        | 2,844              | 3,525       |
| OLS (FDR≤0.2)                                                        | GRO-seq     | 3,745       | 249                        | 2,509              | 1,857       |
| GLM.NB(FDR≤0.2)                                                      | GRO-seq     | 798         | 453                        | 2,830              | 4,279       |
| ZINB(FDR≤0.2)                                                        | GRO-seq     | 1,566       | 681                        | 2,907              | 3,206       |

Each promoter model contained 10 enhancers as features. The number of E-P links is  $y \cdot 10$  links where  $y$  is the number of promoter models in each category

**Table S2. Number of statistically validated promoter models and E-P links predicted by FOCS on four genomic resources**

| Data type      | #promoter models | #E-P links | #Unique enhancers | % intronic E-P links * | # known genes** |
|----------------|------------------|------------|-------------------|------------------------|-----------------|
| ENCODE - DHS   | 70,465           | 167,988    | 92,603            | 74                     | 12,256          |
| Roadmap - DHS  | 21,841           | 69,619     | 49,327            | 67                     | 10,668          |
| FANTOM5 - eRNA | 15,024           | 41,836     | 18,656            | 55                     | 8,666           |
| GRO-seq - eRNA | 6,323            | 22,607     | 20,650            | 79                     | 6,323           |

(\*) E-P links whose E is located within an intron of a gene (not necessarily the target gene)  
(\*\*) Number of Entrez genes associated with promoters

**Table S3. Summary of inferred E-P links**

| Method type            | Data    | # promoter models | #Links to enhancers | #Unique enhancers |
|------------------------|---------|-------------------|---------------------|-------------------|
| Pair-wise              | ENCODE  | 92,080            | 2,396,287           | 326,184           |
| Pair-wise- $r = 0.7$   | ENCODE  | 39,372            | 139,170             | 53,950            |
| OLS-LASSO <sup>1</sup> | ENCODE  | 39,368            | 122,064             | 74,104            |
| OLS-enet <sup>1</sup>  | ENCODE  | 39,407            | 150,158             | 85,926            |
| FOCS*                  | ENCODE  | 70,465            | 167,988             | 92,603            |
| Pair-wise              | Roadmap | 32,000            | 1,023,409           | 106,231           |
| Pair-wise- $r = 0.7$   | Roadmap | 8,606             | 33,598              | 24,657            |
| OLS-LASSO <sup>2</sup> | Roadmap | 6,783             | 27,414              | 21,062            |
| OLS-enet <sup>2</sup>  | Roadmap | 6,788             | 31,923              | 24,167            |
| FOCS*                  | Roadmap | 21,841            | 69,619              | 49,327            |
| Pair-wise              | FANTOM5 | 42,234            | 228,908             | 45,936            |
| Pair-wise- $r = 0.7$   | FANTOM5 | 2,224             | 4,681               | 2,449             |
| OLS-LASSO <sup>3</sup> | FANTOM5 | 1,680             | 3,970               | 2,219             |
| OLS-enet <sup>3</sup>  | FANTOM5 | 1,684             | 5,239               | 2,771             |
| FOCS*                  | FANTOM5 | 15,024            | 41,836              | 18,656            |
| Pair-wise              | GRO-seq | 7,825             | 113,817             | 81,040            |
| Pair-wise- $r = 0.7$   | GRO-seq | 4,347             | 26,827              | 24,247            |
| OLS-LASSO <sup>4</sup> | GRO-seq | 4,570             | 17,141              | 16,121            |
| OLS-enet <sup>4</sup>  | GRO-seq | 4,580             | 21,379              | 19,796            |
| FOCS**                 | GRO-seq | 6,323             | 22,607              | 20,650            |
| FOCS-randCV            | GRO-seq | 7,004             | 23,960              | 21,679            |

(1) The number of OLS promoter models ( $R^2 \geq 0.5$ ) was 39,892 before model selection  
(2) The number of OLS promoter models ( $R^2 \geq 0.5$ ) was 6,807 before model selection  
(3) The number of OLS promoter models ( $R^2 \geq 0.5$ ) was 1,951 before model selection  
(4) The number of OLS promoter models ( $R^2 \geq 0.5$ ) was 4,851 before model selection  
(\*) Selected promoter models passed either both validation tests or the activity level test only  
(\*\*) Selected promoter models passed either binary test and/or the activity level test

## Supplemental Methods

### GRO-seq data preprocessing

We downloaded raw sequence data of 245 GRO-seq samples from the Gene Expression Omnibus (GEO) database (**Additional file 3: Table S5**). First, we applied read quality control on each profile using the Trimmomatic tool (default parameters) [1]. From each read we trimmed (1) bases from Illumina Tru-seq adapters, and (2) bases with low base quality scores from both ends. We excluded reads with net length <30 bases. Finally, we cropped each read to the first 30 bases from the 5' end. Second, we aligned the trimmed read to a set of known ribosomal RNA (rRNA) genes (FASTA sequences taken from NCBI: RN18S1, RN28S1, RN5, and RN5S17) using bowtie2 [2] (default parameters), and discarded reads aligned to rRNA genes. Third, we aligned the rest of the reads to hg19 reference genome using bowtie2 (default parameters). For subsequent analyses we used only reads that had a MAPQ score greater than 10. Fourth, we merged aligned reads from multiple profiles with the same sample id (via GEO GSM id) into a single sample. In total, our collected GRO-Seq database covered 40 studies encompassing 245 samples from 23 cell lines, each assayed under control and stress conditions (**Additional file 3: Table S5**).

We quantified gene transcription activity by counting the number of reads mapped within each (unspliced) gene. As gene models we used a single transcript per gene, constructed using groHMM's makeConsensusAnnotations function [3] and hg19 UCSC refGene table, producing 22,891 consensus genes. We only used reads mapped to the gene's transcript body in the range 0.5kb to 20kb downstream of the TSS. If the transcript's length was less than 20kb then we used only the region up to the transcript termination site (TTS).

To identify active enhancers in each sample, we applied dREG [4] on the aligned reads. dREG detects "*transcriptional regulation elements*" (TREs) based on symmetric forward and reverse read coverage relative to their center position. This symmetry is a known mark of short putative enhancers [5]. We merged overlapping TREs (taking the union of their locations) detected in different samples to create *merged TREs* (mTREs). We defined as enhancers mTREs that are either: (1) intergenic: mTREs whose center is located at least 5kb from the closest gene's TSS and does not overlap any gene's transcript body, or (2) intronic: mTREs that are not exonic and have overlap with an intron of a gene. We counted the number of reads in each intergenic enhancer (in both strands) and intronic enhancer (only in antisense strand) in each sample using BEDTools [6].

The gene and enhancer expression matrices were further filtered to include only genes/enhancers (rows) with at least one sample (columns) with RPKM  $\geq 1$ , in order to preserve only expressed genes/enhancers. Next, to focus of the analysis on differential genes, we calculated for each the coefficient of variation (CoV) (the ratio between the gene's standard deviation  $\sigma$  to the mean  $\mu$ ), and selected the most variable ones as follows: (1) we partitioned the genes according to their mean RPKM expression into 20 bins. (2) In each bin we retained the



genes with CoV above the bin's median level. These two steps also reduce preference to highly or lowly expressed genes. The final gene matrix contained 8,360 genes, and the final enhancer matrix contained 255,925 enhancers.

We defined for each gene the set of  $k=10$  candidate enhancers located within a window of  $\pm 500\text{Kb}$  from its TSS.

### FOCS Model Implementation

The input to FOCS is two activity matrices, one for enhancers ( $M_e$ ) and the other for promoters ( $M_p$ ), measured across the same samples. Activity is measured by DHS signal in ENCODE and Roadmap data, and by expression level in FANTOM5 and GRO-seq data. Samples were labeled with a cell-type label out of  $C$  cell-types. The output of FOCS is predicted E-P links.

First, FOCS builds for each promoter an OLS regression model based on the  $k$  enhancers whose center positions are closest to the promoter's center position (in ENCODE, Roadmap, and FANTOM5) or TSS (in GRO-seq). Formally, let  $y_p$  be the promoter  $p$  normalized activity pattern (measured in CPM - counts per million;  $y_p$  is a row from  $M_p$ ) and let  $X_p$  be the normalized activity matrix of the corresponding  $k$  enhancers (CPM;  $k$  rows from  $M_e$ ). We build an OLS linear regression model  $y_p = X_p \beta_p + \varepsilon_p$ , where  $\varepsilon_p$  is a vector that denotes the errors of the model and  $\beta_p$  is the  $(k + 1) \times 1$  vector of coefficients (including the intercept) to be estimated.

Second, FOCS performs leave-cell-type-out cross validation (LCTO CV) by training the promoter model based on samples from  $C - 1$  cell types and testing the predicted promoter activity of the samples from the left out cell type. This step is repeated  $C$  times. The result is a vector of predicted activity values  $y_p^{model}$  for all samples.

FOCS tests the predicted activity values using two validation tests: (1) The *binary test*. This test examines whether  $y_p^{model}$  discriminates between the samples in which  $p$  was active (observed activity  $y_p \geq 1$  RPKM) and the samples in which  $p$  was inactive ( $y_p < 1$  RPKM). (2) The *activity level test*. This test calculates, for the active samples, the significance of the Spearman correlation between  $y_p^{model}$  and  $y_p$ . Spearman correlation compares the ranks of the original and predicted activities. We obtain two vectors of p-values, one for each test, of length  $n$  (the number of promoter models).

Third, to correct for multiple testing, FOCS applies on each p-value vector the Benjamini - Yekutieli (BY) FDR procedure [7]. Promoter models with  $q\text{-value} \leq 0.1$  in either both tests or in the activity level test were included in further analyses. In GRO-seq analysis, we also included models that passed only the binary test ( $m=2,580$ ) since 57% of them had  $R^2 \geq 0.5$  (**Fig. S6B**). For promoters that passed these CV tests final models are trained again using all samples.

FOCS next selects informative enhancers for each final promoter model. First, to control the FDR due to multiple hypotheses we used the BY correction. We call this process *enhancer BY FDR filtering (eBY)*. The OLS results provide for each model P-values for the coefficients of its 10

closest enhancers. FOCS applies BY correction on the P-values produced by all models together and selects enhancers with q-value  $\leq 0.01$ . To identify the most important ones out of the selected ( $\leq 10$ ) enhancers for each promoter model, FOCS applies elastic-net model shrinkage (**enet**) with a regularization parameter  $\lambda$ , using the glmnet R function [8] with mixing parameter  $\alpha=0.5$ , giving equal weights for Lasso and Ridge regularizations. We require that all the enhancers that survived eBY filtering will be included in the shrunken model. To achieve this we take the maximum  $\lambda$  satisfying this property. For models in which no enhancer survived the eBY filtering, we took the maximum  $\lambda$  yielding a shrunken model with at least one enhancer. This ensures that every promoter that passes the CV tests also has a model following the enet step.

### **Alternative regression methods**

We compared the performance of OLS method with GLM.NB and ZINB regression methods. We repeated the FOCS steps but in the first step, instead of OLS we applied the GLM.NB or the ZINB methods. In GLM.NB/ZINB we used for  $y_p$  and  $X_p$  the raw count values instead of CPM. To correct the model according to differences in samples library sizes, we provided these sizes as an offset vector to GLM.NB and ZINB methods.

FANTOM5 E-P linking using OLS regression was followed by Lasso shrinkage (defined as OLS-LASSO) as described in [9]. Briefly, promoter models were created using OLS and models with  $R^2 \geq 0.5$  were accepted for further analyses. Next, penalized Lasso regression was used to reduce the number of enhancers in the models. Optimal models were selected using 100-fold cross validation and the largest value of lambda such that the mean square error was within one standard error of the minimum, using the cv.glmnet() function in R glmnet package [8]. OLS followed by enet (called OLS-enet) was run with mixing parameter  $\alpha = 0.5$  in the cv.glmnet() function. OLS followed by LASSO (OLS-LASSO) was run with  $\alpha = 1$ .

### **GO enrichment analysis**

GO enrichments were calculated using topGO R package [10] (algorithm="classic", statistic="fisher", minimum GO set size=10). We split the genes into target and background sets using their enhancer bin sets. Genes belonging to bins with 1-3/1-4/4-10/5-10 enhancers were considered as target set and compared to all genes from all bins as background set. Correction for multiple testing was performed using BH procedure [11].

### **External validation of predicted E-P links**

We used three external data resources for validating FOCS E-P link predictions: (1) RNAPII ChIA-PET interactions, (2) YY1-HiChIP interactions, and (3) eQTL SNPs.

We downloaded 922,997 ChIA-PET interactions (assayed with RNAPII, on four cell lines: MCF7, HCT-116, K562 and HeLaS3) from the chromatin–chromatin spatial interaction (CCSI) database [12] (GEO accession numbers of the ChIA-PET samples are provided in supplementary table S6). We used the liftOver tool (from Kent utils package provided by UCSC) to transform the genomic coordinates of the interactions from hg38 to hg19. HiChIP interactions mediated by YY1 TF (cell types: HCT116, Jurkat, and K562) were taken from [13] (GEO accession id: GSE99521). As done in [13], we retained 911,190 YY1-HiChIP interactions with origami probability > 0.9. Origami is a method that aims to find high confident interactions. For eQTL SNPs, we used the significant SNP-gene pairs from GTEx analysis V6 and V6p builds. 2,283,827 unique eQTL SNPs covering 44 different tissues were downloaded from GTEx portal [14].

We used 1Kbp intervals ( $\pm 500$  bp upstream/downstream) for the promoters (relative to the center position in ENCODE/Roadmap/FNATOM5 or to the TSS position in GRO-seq) and the enhancers ( $\pm 500$  bp from the enhancer center). An E-P pair is considered supported by a particular capture interaction if both the promoter and enhancer intervals overlap different anchors of an interaction. An E-P pair is considered supported by eQTL SNP if the SNP is located within the enhancer's interval and is associated with the expression of the promoter's gene. For each predicted E-P pair we checked if the promoter and enhancer intervals are supported by capture interactions and eQTL data. We then measured the fraction of E-P pairs supported by these data resources.

To get an empirical P-value for the significance of the fraction, we performed 100 permutations on the data (100 permutations were sufficient as in all methods we got empirical P-value < 0.01). In each permutation, for each promoter independently, if it had  $l$  E-P links, then  $l$  enhancers on the same chromosome with similar distances from the gene's TSS as the  $l$  linked enhancers were selected randomly. For this purpose we used the R 'Matching' package [15]. The fraction of overlap with the external data was computed on each permuted data.

### **Statistical tests, visualization and tools used**

All computational analyses and visualizations were done in the R statistical language environment [16]. We used the two-sided Wilcoxon rank-sum test implemented in `wilcox.test()` function to compute the significance of the binary test. We used the `cor.test()` function to compute the significance of the Spearman correlation in the activity level test. Spearman/Pearson correlations were computed using the `cor()` function. To correct for multiple testing we used the `p.adjust()` function (method='BY'). We used 'GenomicRanges' package [17] for finding overlaps between genomic positions. We used 'rtracklayer' [18] and 'GenomicInteractions' [19] packages to import/export genomic positions. Counting reads in genomic positions was calculated using BEDTools [6]. OLS models were created using `lm()` function in 'stat' package [16]. GLM.NB models were created using `glm.nb()` function in 'MASS' package [20]. ZINB models were created using `zeroinfl()` function in 'pscl' package [21]. Graphs were made using graphics [16], ggplot2 [22], gplots [23], and the UCSC genome browser (<https://genome.ucsc.edu/>).

## References

1. Bolger AM, Lohse M, Usadel B. Genome analysis Trimmomatic : a flexible trimmer for Illumina sequence data. 2014;30:2114–20.
2. Langmead B, Salzberg SL. Fast gapped-read alignment with Bowtie 2. 2012;9:357–60.
3. Chae M, Danko CG, Kraus WL. groHMM : a computational tool for identifying unannotated and cell type-specific transcription units from global run-on sequencing data. BMC Bioinformatics [Internet]. BMC Bioinformatics; 2015;9–11. Available from: <http://dx.doi.org/10.1186/s12859-015-0656-3>
4. Danko CG, Hyland SL, Core LJ, Martins AL, Waters CT, Lee HW, et al. Identification of active transcriptional regulatory elements from GRO-seq data. Nat. Methods. Nature Research; 2015;12:433–8.
5. Kim T-K, Hemberg M, Gray JM, Costa AM, Bear DM, Wu J, et al. Widespread transcription at neuronal activity-regulated enhancers. Nature. 2010;465:182–7.
6. Quinlan AR, Hall IM. BEDTools : a flexible suite of utilities for comparing genomic features. 2010;26:841–2.
7. Benjamini Y, Yekutieli D. The control of the false discovery rate in multiple testing under dependency. Ann. Stat. JSTOR; 2001;1165–88.
8. Friedman J, Hastie T, Tibshirani R. Regularization paths for generalized linear models via coordinate descent. J. Stat. Softw. NIH Public Access; 2010;33:1.
9. Andersson R, Gebhard C, Miguel-Escalada I, Hoof I, Bornholdt J, Boyd M, et al. An atlas of active enhancers across human cell types and tissues. Nature. 2014;507:455–61.
10. Alexa A, Rahnenfuhrer J. topGO: Enrichment Analysis for Gene Ontology. R package version 2.28.0; 2016.
11. Benjamini Y, Hochberg Y. Controlling the false discovery rate: a practical and powerful approach to multiple testing. J. R. Stat. Soc. Ser. B. JSTOR; 1995;289–300.
12. Xie X, Ma W, Songyang Z, Luo Z, Huang J, Dai Z, et al. Original article CCSI : a database providing chromatin – chromatin spatial interaction information. 2016;1–7.
13. Weintraub AS, Li CH, Zamudio A V., Sigova AA, Hannett NM, Day DS, et al. YY1 Is a Structural Regulator of Enhancer-Promoter Loops. Cell. 2017;171:1573–1579.e28.
14. Consortium Gte, others. The Genotype-Tissue Expression (GTEx) pilot analysis: Multitissue gene regulation in humans. Science (80-. ). 2015;348:648–60.
15. Sekhon JS. Multivariate and propensity score matching software with automated balance optimization: the matching package for R. 2011;
16. R Core Team. R: A Language and Environment for Statistical Computing [Internet]. Vienna, Austria; 2017. Available from: <https://www.r-project.org/>
17. Aboyoun P, Carlson M, Lawrence M, Huber W, Gentleman R, Morgan MT, et al. Software for Computing and Annotating Genomic Ranges. 2013;9:1–10.
18. Lawrence M, Gentleman R, Carey V. rtracklayer: an R package for interfacing with genome browsers. Bioinformatics. 2009;25:1841–2.
19. Harmston, N., Ing-Simmons, E., Perry, M., et al. GenomicInteractions: R package for handling genomic interaction data [Internet]. 2015. Available from: <https://github.com/ComputationalRegulatoryGenomicsICL/GenomicInteractions/>
20. Venables WN, Ripley BD. Modern Applied Statistics with S. Fourth. New York; 2002.
21. Zeileis A, Kleiber C, Jackman S. Regression models for count data in R. J. Stat. Softw. 2008;27:1–25.

22. Wickham H. ggplot2: Elegant Graphics for Data Analysis [Internet]. Springer-Verlag New York; 2009. Available from: <http://ggplot2.org>
23. Warnes GR, Bolker B, Bonebakker L, Gentleman R, Liaw WHA, Lumley T, et al. gplots: Various R Programming Tools for Plotting Data [Internet]. 2016. Available from: <https://cran.r-project.org/package=gplots>
